# Supplementary material for: Nucleolin binds to a subset of selenoprotein mRNAs and regulates their expression
Source: PubMed Central journal article supplement — Nucleic Acids Res. 2010 Apr 12;38(14):4807–20. doi: 10.1093/nar/gkq247 (PMC2919729; doi:10.1093/nar/gkq247), 2010-04-12
Supplement: supp_gkq247_nar-02377-w-2009-File009.pdf [file supp_gkq247_nar-02377-w-2009-File009.pdf]

# Supplementary Table S1

List of nucleotide sequences for SECIS elements and irrelevant RNAs

| SECIS element  | Species | Accession number | Encompasses nucleotides |
|----------------|---------|------------------|-------------------------|
| PHGPx          | Rat     | U37427           | 655-854                 |
| GPx1           | Rat     | NM030826         | 675-855                 |
| TR1-long       | Mouse   | AB027565         | 1659-3210               |
| TR1-short      | Mouse   | AB027565         | 1818-2025               |
| SelR           | Mouse   | AF195142         | 393-863                 |
| SelW           | Mouse   | BC052719         | 321-660                 |
| SelN           | Human   | NM020451         | 2843-3054               |
| SelO           | Mouse   | AK005048         | 1998-2360               |
| Dio2           | Human   | NM013989         | 6331-6480               |
| GPx2           | Mouse   | BC039658         | 698-1008                |
| Dio1           | Rat     | X57999           | 1497-1630               |
| Sel15          | Rat     | BC060547         | 1019-1217               |
| SelT           | Human   | NM016275         | 673-861                 |
| SBP2, region 1 | Rat     | NM024002         | 2978-3120               |
| SBP2, region 2 | Rat     | NM024002         | 2585-2684               |
| VEGFA HSR      | Human   | NM0010253366     | 2069-2193               |

## Supplementary Table S2

List of primers used for mutagenesis and qRT-PCR

| Target Sequence | Primer Sequence                                                                                                                                              |
|-----------------|--------------------------------------------------------------------------------------------------------------------------------------------------------------|
| AAR -> GGG      | FWD 5'- GACGGTCTGCCTGGGGACCAGCCCGCTGG -3'<br>REV 5'- CCAGCGGGCTGGTCCCCAGGCAGACCGTC -3'                                                                       |
| WT LOOPLESS     | FWD 5'- CCCGGCACTCATGACGGTCTGCCAATGAGGCAGTCC<br>CGAGGACCTGGCGTGCATCCCCGC -3'<br>REV 5'- GCGGGGATGCACGCCAGGTCCTCGGGACTGCCTCAT<br>TGGCAGACCGTCATGAGTGCCGGG -3' |
| PHGPx           | FWD 5'- GCTGCGTGGTGAAGCGCTATGGT -3'<br>REV 5'- TTTATTCCCACAAGGCAGCC -3'                                                                                      |
| GPx1            | FWD 5'- CTAAAGCTTCACCACGACCCGGGAC -3'<br>REV 5'- CCAGAATTCCATTACCTCGCACTTC -3'                                                                               |
| TR1             | FWD 5'- GGATCTTGTGGGTAGGAGG -3'<br>REV 5'- GCTTGAAGGCGAGACTAAAA -3'                                                                                          |
| Sel15           | FWD 5'- CTAGCGGAATTCATGTGCCACATACAATTTTTATAGCC -3'<br>REV 5'- CTAGCGAAGCTTACGAACATTCTTAAATGGAACCTTCTG -3'                                                    |
| GAPDH           | FWD 5'- CCCCTGGCCAAGGTCATCCA -3'<br>REV 5'- CGGAAGGCCATGCCAGTGAG -3'                                                                                         |
| $\beta$ -ACTIN  | FWD 5'- ATGGTGGGTATGGGTCAGAAGG -3'<br>REV 5'- GCTCATTGTAGAAAGTGTGGTGCC -3'                                                                                   |
